# Supplementary figures and images for: Species-specific chemosensory gene expression in the olfactory organs of the malaria vector Anopheles gambiae
Source: PubMed Central journal article supplement (PMC4299676; doi:10.1186/1471-2164-15-1089), 2014-12-11

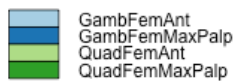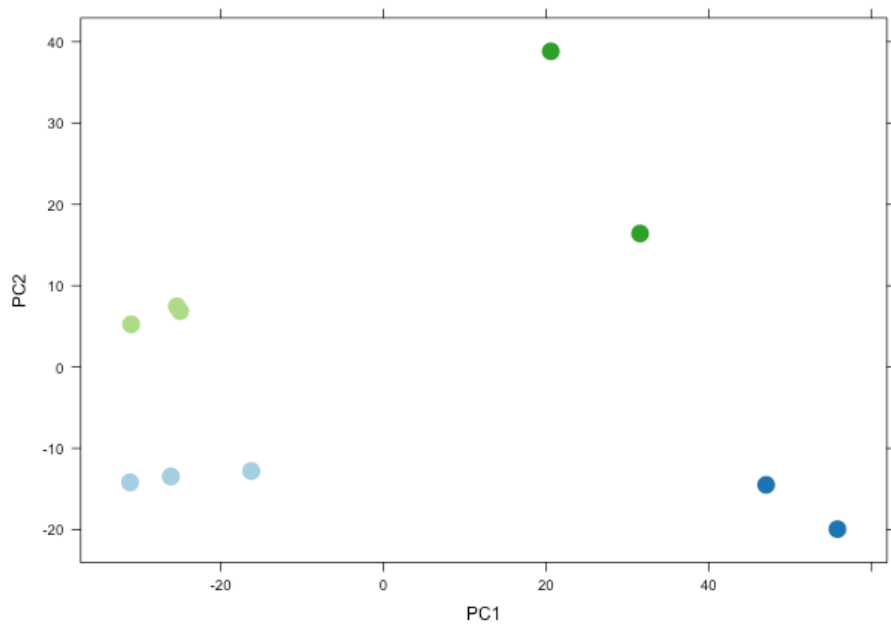

Supplement: 12864_2014_6806_MOESM1_ESM.pdf [file 12864_2014_6806_MOESM1_ESM.pdf]

A

## Molecular Function - QuadAnt

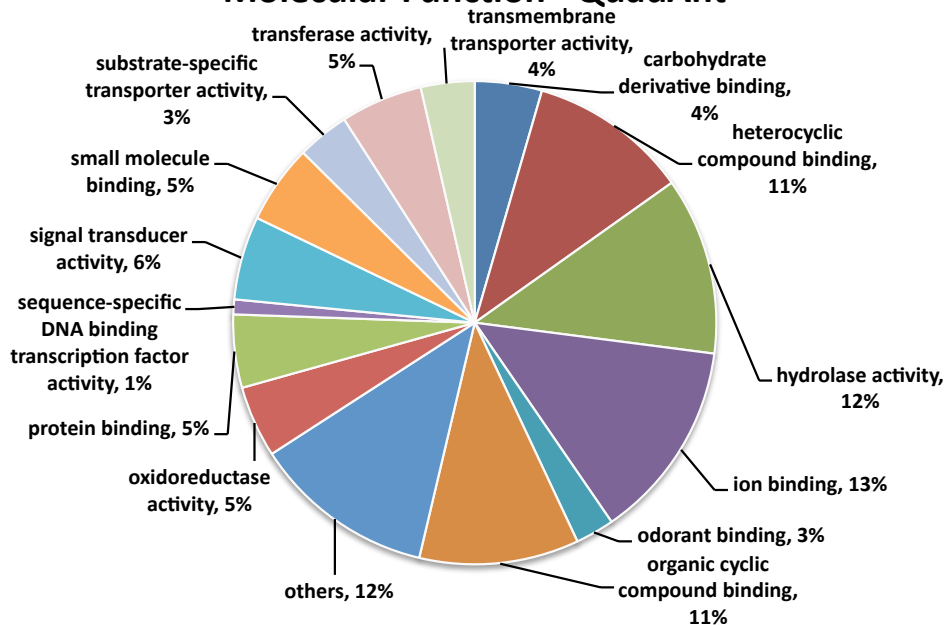

B

## Biological Process - QuadAnt

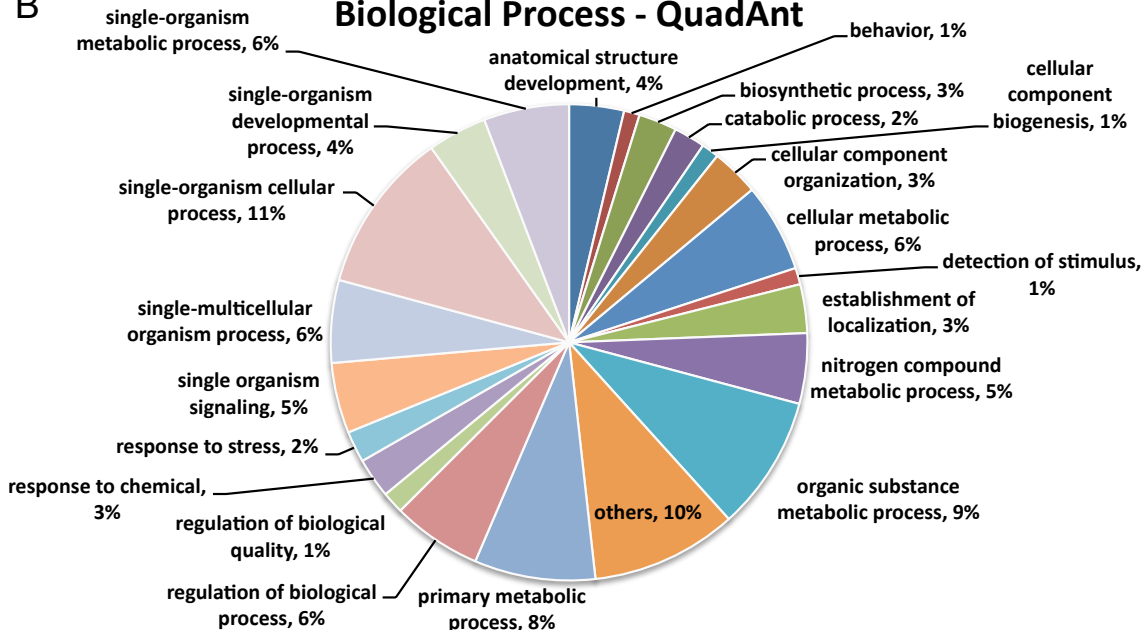

Supplement: 12864_2014_6806_MOESM2_ESM.pdf [file 12864_2014_6806_MOESM2_ESM.pdf]
